# Supplementary material for: Ultrastructural Changes in Mitochondria in Patients with Dilated Cardiomyopathy and Parvovirus B19 Detected in Heart Tissue without Myocarditis
Source: MDPI journal article supplement (doi:10.3390/jpm12020177), 2022-01-28
Supplement: s1 [file s1]

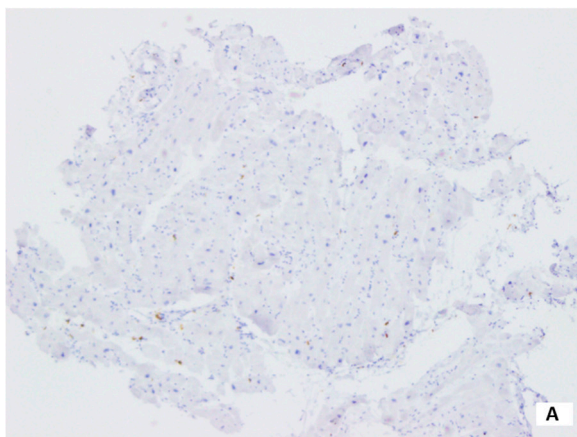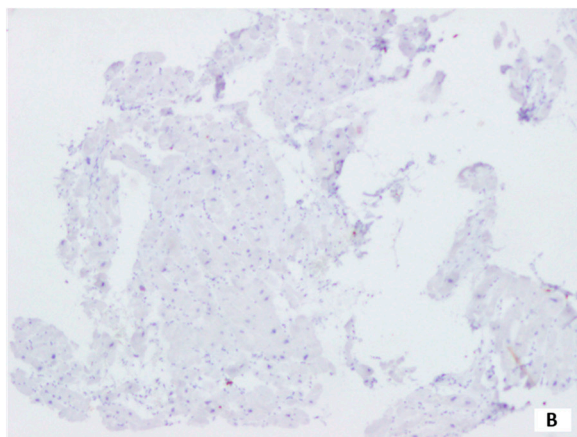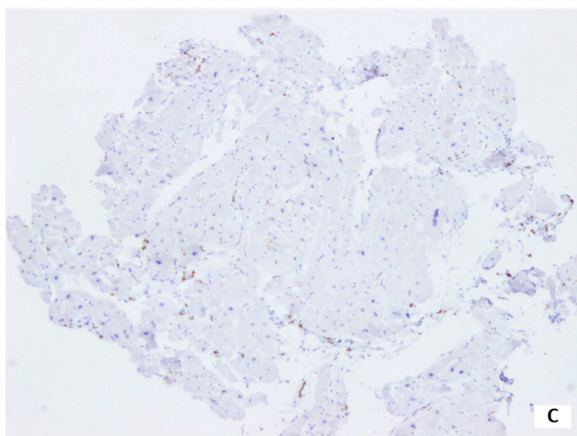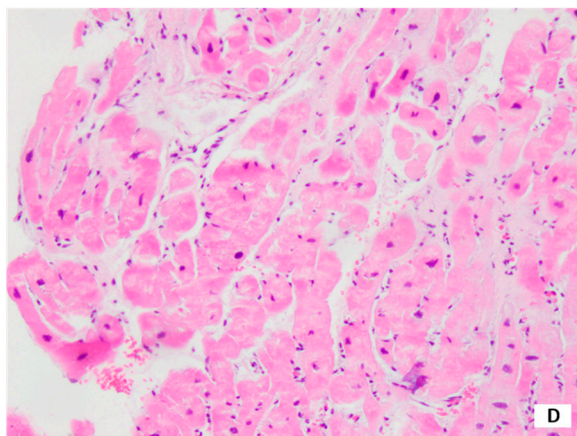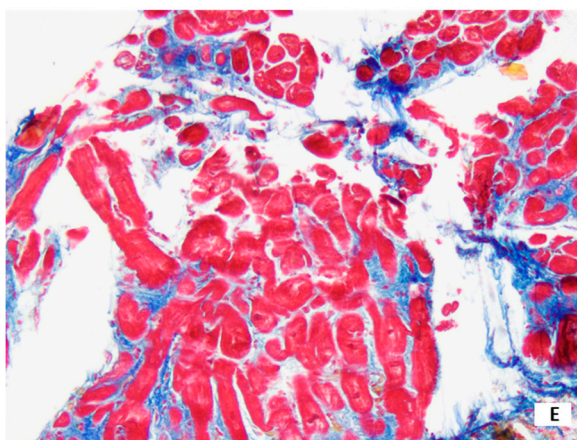

**Figure S1.** Heart tissue samples from patients with DCM and PB19V: A – infiltration of leucocytes; B - infiltration of CD3 positive cells; C - infiltration of CD68 positive cells. All immunostainings performed with Dako anti human antibodies and EnVision HRP system (Dako, Germany), magnification x40, D - myocytolysis in hematoxylin and eosin staining, magnification x100; E - fibrosis in Masson's trichrome staining, magnification x100.
